# Supplementary material for: Gene Expression Profiles for the Identification of Prevalent Atrial Fibrillation
Source: PubMed Central journal article supplement — J Am Heart Assoc. 2017 Jun 30;6(7):e006057. doi: 10.1161/JAHA.117.006057 (PMC5586311; doi:10.1161/jaha.117.006057), 2017-06-30
Supplement: JAH3-6-e006057-s001.pdf [file JAH3-6-e006057-s001.pdf]

# **SUPPLEMENTAL MATERIAL**

**Table S1. Parameters of the multivariate model including both gene scores for the prediction of prevalent AF**

| <b>Variable</b>         | <b>Estimate</b> | <b>SE</b>   | <b>z-value</b> | <b>p-value</b> |
|-------------------------|-----------------|-------------|----------------|----------------|
| Intercept               | -27.22          | 15.25       | -1.79          | 0.074          |
| <b>AF-GS</b>            | <b>2.00</b>     | <b>0.62</b> | <b>3.24</b>    | <b>0.001</b>   |
| <b>BA-GS</b>            | <b>2.71</b>     | <b>0.99</b> | <b>2.74</b>    | <b>0.006</b>   |
| Age                     | 0.03            | 0.02        | 1.42           | 0.157          |
| <b>Sex</b>              | <b>1.08</b>     | <b>0.42</b> | <b>2.55</b>    | <b>0.011</b>   |
| BMI                     | 0.09            | 0.23        | 0.39           | 0.695          |
| Height                  | 0.09            | 0.08        | 1.14           | 0.255          |
| Weight                  | -0.04           | 0.08        | -0.49          | 0.625          |
| <b>SBP</b>              | <b>-0.03</b>    | <b>0.01</b> | <b>-3.42</b>   | <b>0.0006</b>  |
| DBP                     | 0.03            | 0.02        | 1.67           | 0.095          |
| Hypertension            | -0.03           | 0.38        | -0.08          | 0.933          |
| Coronary artery disease | -0.38           | 0.29        | -1.29          | 0.197          |
| <b>Heart failure</b>    | <b>1.09</b>     | <b>0.30</b> | <b>3.64</b>    | <b>0.0003</b>  |
| <b>Valve</b>            | <b>0.90</b>     | <b>0.45</b> | <b>1.97</b>    | <b>0.048</b>   |
| Smoking recent          | -0.53           | 0.51        | -1.04          | 0.300          |
| Smoking ever            | -0.06           | 0.31        | -0.21          | 0.837          |
| Diabetes                | -0.09           | 0.34        | -0.27          | 0.791          |
| Dyslipidemia            | -0.36           | 0.32        | -1.13          | 0.259          |
| Chronic renal failure   | 0.82            | 0.45        | 1.82           | 0.069          |
| <b>COPD</b>             | <b>0.85</b>     | <b>0.38</b> | <b>2.25</b>    | <b>0.025</b>   |
| Lymphocytes             | 5.10            | 6.38        | 0.80           | 0.424          |
| Neutrophils             | -5.74           | 6.26        | -0.92          | 0.359          |
| Monocytes               | 9.18            | 8.29        | 1.11           | 0.268          |

BMI: Body-mass index; SBP: Systolic blood pressure; DBP: Diastolic blood pressure; COPD: Chronic obstructive pulmonary disease

**Table S2. Detailed reclassification of participants when adding the gene scores to the clinical model**

| <b>Outcome</b>   | <b>Event up</b> | <b>Event down</b> | <b>Non-event up</b> | <b>Non-event down</b> | <b>Net absolute reclassification</b> |
|------------------|-----------------|-------------------|---------------------|-----------------------|--------------------------------------|
| All prevalent AF | <b>54</b>       | 37                | 106                 | <b>214</b>            | 125                                  |
| Paroxysmal AF    | <b>20</b>       | 11                | 116                 | <b>204</b>            | 97                                   |
| Permanent AF     | <b>26</b>       | 24                | 125                 | <b>195</b>            | 72                                   |

Reclassification when adding both gene scores to the clinical model (model 2)

Numbers in bold represent reclassification in the right direction

Net absolute reclassification represents the net number of participants correctly reclassified: (Event up - Event down) + (Non-event down - Non-event up)

**Table S3. Predictive performance, reclassification and discrimination for Paroxysmal AF**

|                               | AUC (95% CI)          | p-value | cNRI (95% CI)          | p-value | IDI (95% CI)           | p-value | Calibration<br>$\chi^2$ (p-value) |
|-------------------------------|-----------------------|---------|------------------------|---------|------------------------|---------|-----------------------------------|
| <i>Compared to RF only</i>    |                       |         |                        |         |                        |         |                                   |
| RF only                       | 0.691 (0.593 - 0.790) | ---     | ---                    | ---     | ---                    | ---     | 1.24 (0.996)                      |
| RF + AF-GS                    | 0.742 (0.656 - 0.828) | 0.117   | 0.282 (-0.085 - 0.65)  | 0.132   | 0.039 (0.003 - 0.074)  | 0.032   | 8.27 (0.41)                       |
| RF + BA-GS                    | 0.716 (0.626 - 0.806) | 0.378   | 0.274 (-0.090 - 0.638) | 0.141   | 0.010 (-0.006 - 0.026) | 0.204   | 9.67 (0.29)                       |
| RF + Both GSs                 | 0.752 (0.663 - 0.841) | 0.167   | 0.565 (0.212 - 0.918)  | 0.002   | 0.052 (0.009 - 0.095)  | 0.018   | 10.28 (0.25)                      |
| <i>Compared to RF + BA-GS</i> |                       |         |                        |         |                        |         |                                   |
| RF + Both GSs                 | 0.752 (0.663 - 0.841) | 0.182   | 0.251 (-0.117 - 0.619) | 0.181   | 0.042 (0.008 - 0.075)  | 0.015   | 10.28 (0.25)                      |
| <i>Compared to RF + AF-GS</i> |                       |         |                        |         |                        |         |                                   |
| RF + Both GSs                 | 0.752 (0.663 - 0.841) | 0.630   | 0.216 (-0.151 - 0.582) | 0.250   | 0.013 (-0.002 - 0.029) | 0.083   | 10.28 (0.25)                      |

RF: risk factors for AF from model 2 (age, sex, BMI, height, weight, smoking status (in the last 12 months and ever), systolic blood pressure, diastolic blood pressure, hypertension, diabetes, coronary artery disease, dyslipidemia, congestive heart failure, valvular heart disease, chronic renal failure, chronic obstructive pulmonary disease, relative lymphocytes, neutrophils and monocytes)

AUC: Area under the ROC curve

cNRI: continuous net reclassification improvement index

IDI: integrated discrimination improvement index

**Table S4. Predictive performance, reclassification and discrimination for Permanent AF**

|                               | AUC (95% CI)          | p-value | cNRI (95% CI)          | p-value | IDI (95% CI)           | p-value | Calibration $\chi^2$<br>(p-value) |
|-------------------------------|-----------------------|---------|------------------------|---------|------------------------|---------|-----------------------------------|
| Compared to RF only           |                       |         |                        |         |                        |         |                                   |
| RF only                       | 0.853 (0.795 - 0.911) | ---     | ---                    | ---     | ---                    | ---     | 8.36 (0.40)                       |
| RF + AF GS                    | 0.855 (0.799 - 0.911) | 0.709   | 0.438 (0.146 - 0.729)  | 0.003   | 0.006 (-0.006 - 0.017) | 0.353   | 11.57 (0.17)                      |
| RF + BA GS                    | 0.854 (0.797 - 0.911) | 0.905   | 0.276 (-0.019 - 0.572) | 0.067   | 0.023 (0.003 - 0.044)  | 0.027   | 11.31 (0.18)                      |
| RF + Both GSs                 | 0.860 (0.806 - 0.915) | 0.419   | 0.259 (-0.038 - 0.556) | 0.088   | 0.029 (0.004 - 0.054)  | 0.022   | 5.73 (0.68)                       |
| <i>Compared to RF + BA-GS</i> |                       |         |                        |         |                        |         |                                   |
| RF + Both GSs                 | 0.860 (0.806 - 0.915) | 0.162   | 0.335 (0.041 - 0.629)  | 0.026   | 0.006 (-0.005 - 0.017) | 0.260   | 5.73 (0.68)                       |
| <i>Compared to RF + AF-GS</i> |                       |         |                        |         |                        |         |                                   |
| RF + Both GSs                 | 0.860 (0.806 - 0.915) | 0.540   | 0.239 (-0.057 - 0.535) | 0.114   | 0.023 (0.004 - 0.043)  | 0.018   | 5.73 (0.68)                       |

RF: risk factors for AF from model 2 (age, sex, BMI, height, weight, smoking status (in the last 12 months and ever), systolic blood pressure, diastolic blood pressure, hypertension, diabetes, coronary artery disease, dyslipidemia, congestive heart failure, valvular heart disease, chronic renal failure, chronic obstructive pulmonary disease, relative lymphocytes, neutrophils and monocytes)

AUC: Area under the ROC curve

cNRI: continuous net reclassification improvement index

IDI: integrated discrimination improvement index

**Figure S1.**

|                 | <b>OR [95% CI]</b> | <b>P-value</b> |
|-----------------|--------------------|----------------|
| <b>AF-GS</b>    |                    |                |
| Univariate      | 1.41 [1.07 - 1.87] | 0.016          |
| Model 1         | 1.45 [1.09 - 1.93] | 0.012          |
| Model 2         | 1.57 [1.09 - 2.27] | 0.015          |
| Model 2 + BA-GS | 1.61 [1.12 - 2.31] | 0.011          |
| <b>BA-GS</b>    |                    |                |
| Univariate      | 1.24 [0.91 - 1.70] | 0.17           |
| Model 1         | 1.17 [0.85 - 1.62] | 0.33           |
| Model 2         | 1.95 [1.03 - 3.68] | 0.04           |
| Model 2 + AF-GS | 2.09 [1.08 - 4.03] | 0.029          |
| <b>Both GSs</b> |                    |                |
| Univariate      | 1.46 [1.09 - 1.97] | 0.011          |
| Model 1         | 1.42 [1.05 - 1.93] | 0.021          |
| Model 2         | 2.23 [1.36 - 3.65] | 0.0014         |

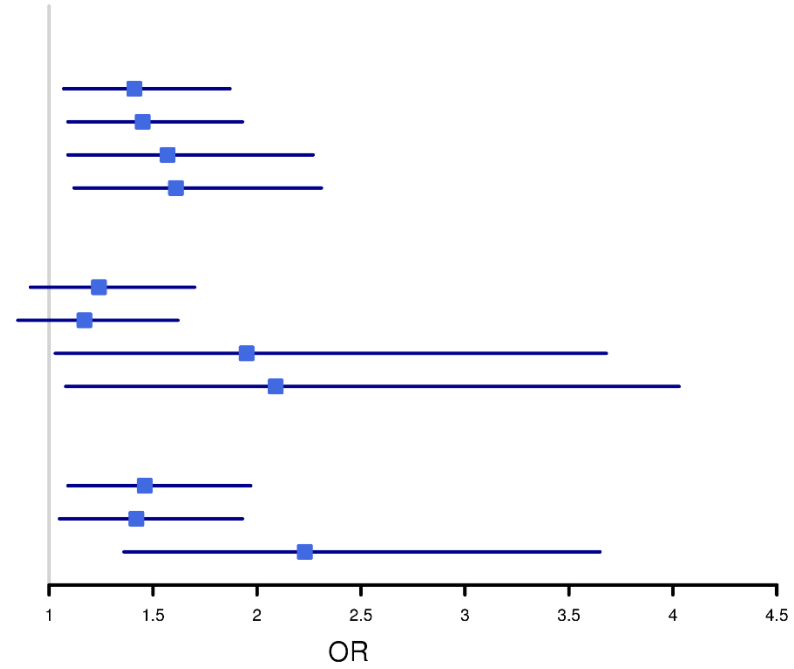

Figure S2.

|                 | OR [95% CI]        | P-value |
|-----------------|--------------------|---------|
| <b>AF-GS</b>    |                    |         |
| Univariate      | 1.84 [1.35 - 2.51] | 0.00012 |
| Model 1         | 1.78 [1.30 - 2.43] | 0.00035 |
| Model 2         | 1.81 [1.22 - 2.70] | 0.0034  |
| Model 2 + BA-GS | 1.78 [1.20 - 2.64] | 0.0043  |
| <b>BA-GS</b>    |                    |         |
| Univariate      | 1.41 [0.97 - 2.07] | 0.076   |
| Model 1         | 1.51 [1.01 - 2.25] | 0.043   |
| Model 2         | 1.87 [0.93 - 3.73] | 0.077   |
| Model 2 + AF-GS | 1.83 [0.89 - 3.79] | 0.1     |
| <b>Both GSs</b> |                    |         |
| Univariate      | 1.92 [1.37 - 2.71] | 0.00017 |
| Model 1         | 1.87 [1.33 - 2.64] | 0.00032 |
| Model 2         | 2.46 [1.47 - 4.10] | 0.00057 |

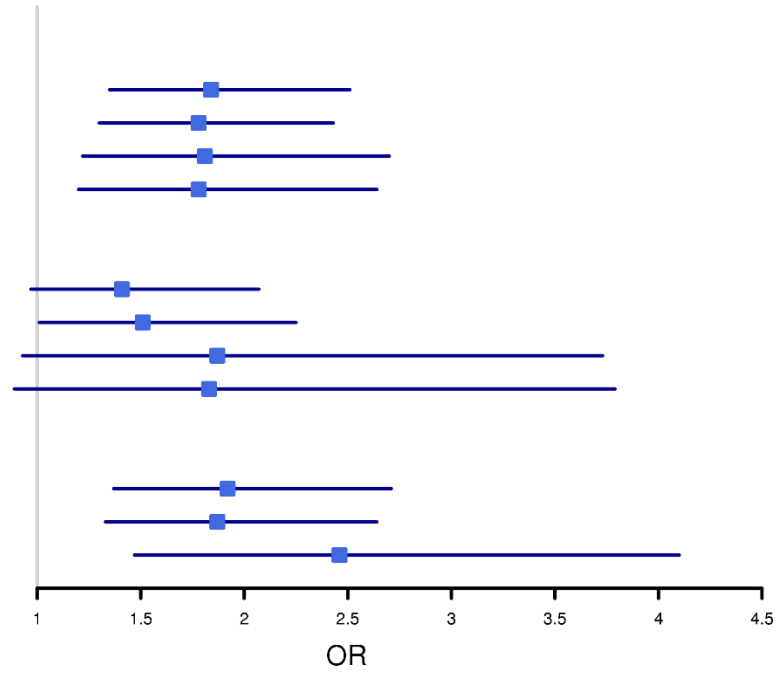

Figure S3.

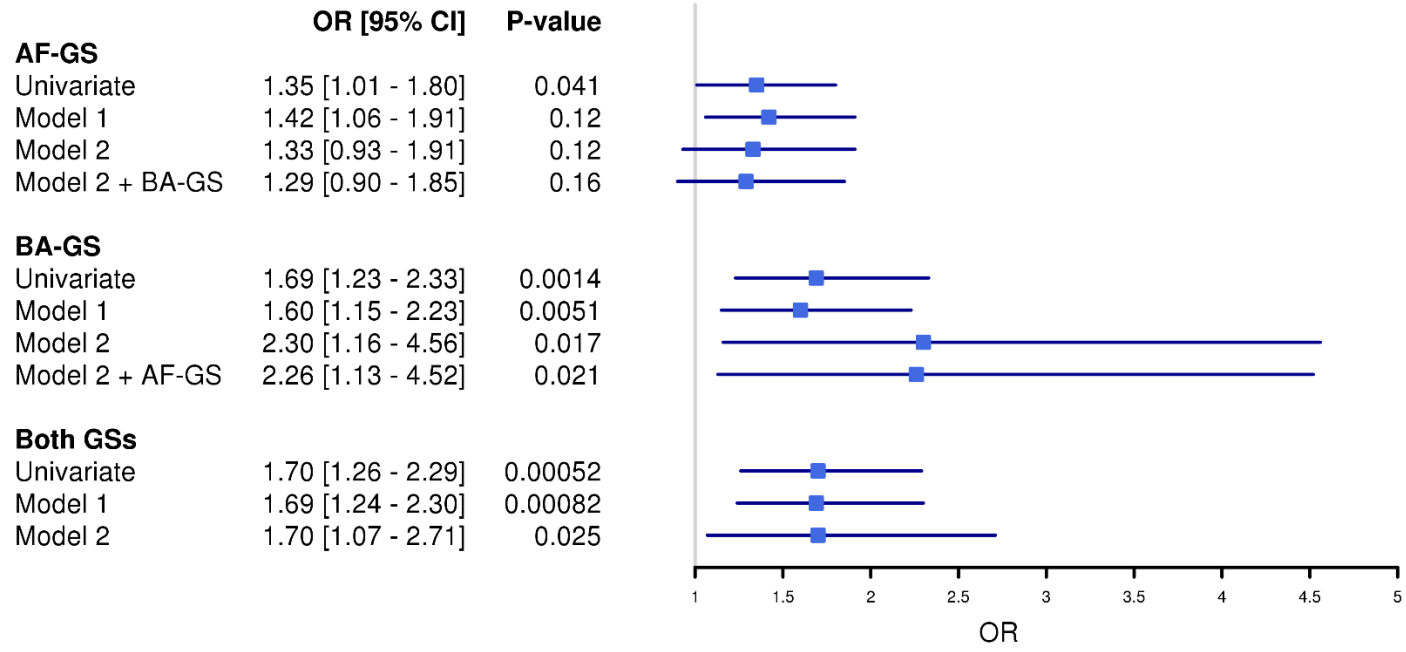



**Figure S4.**

**A**

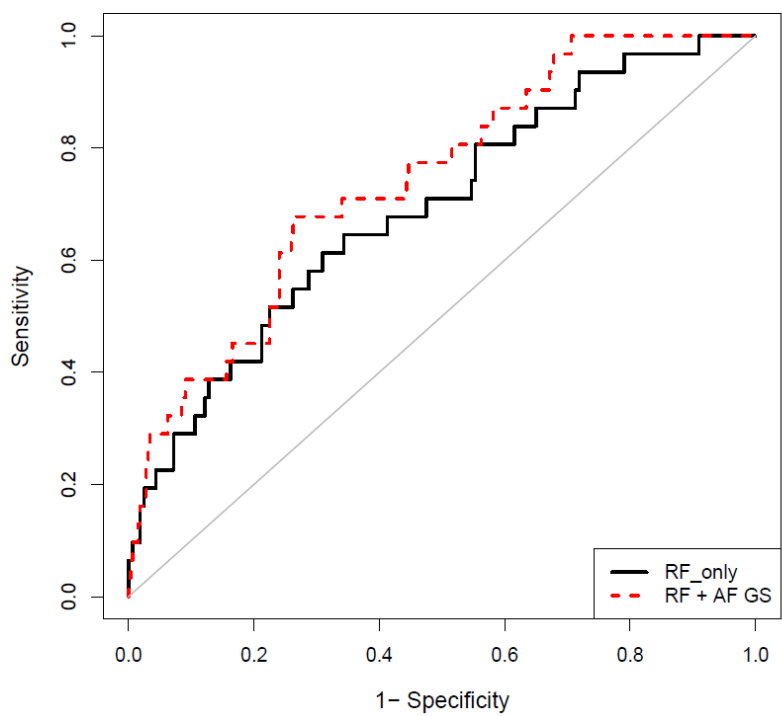

**B**

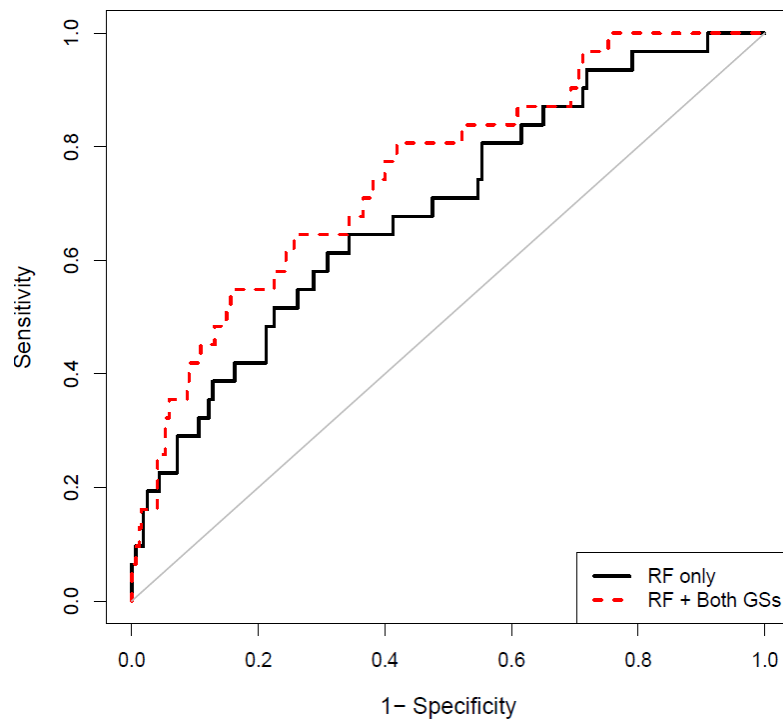

**C**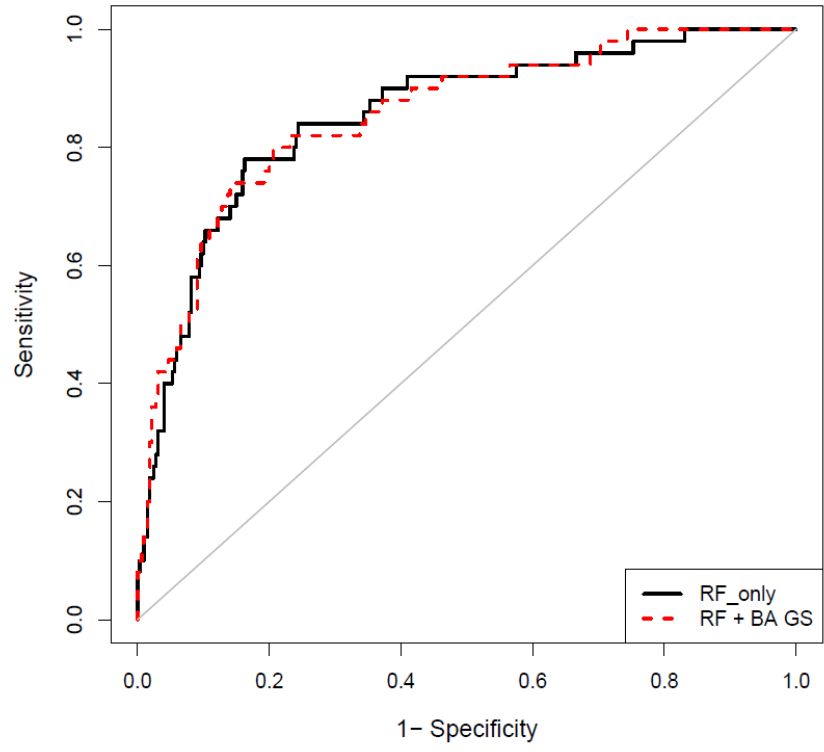**D**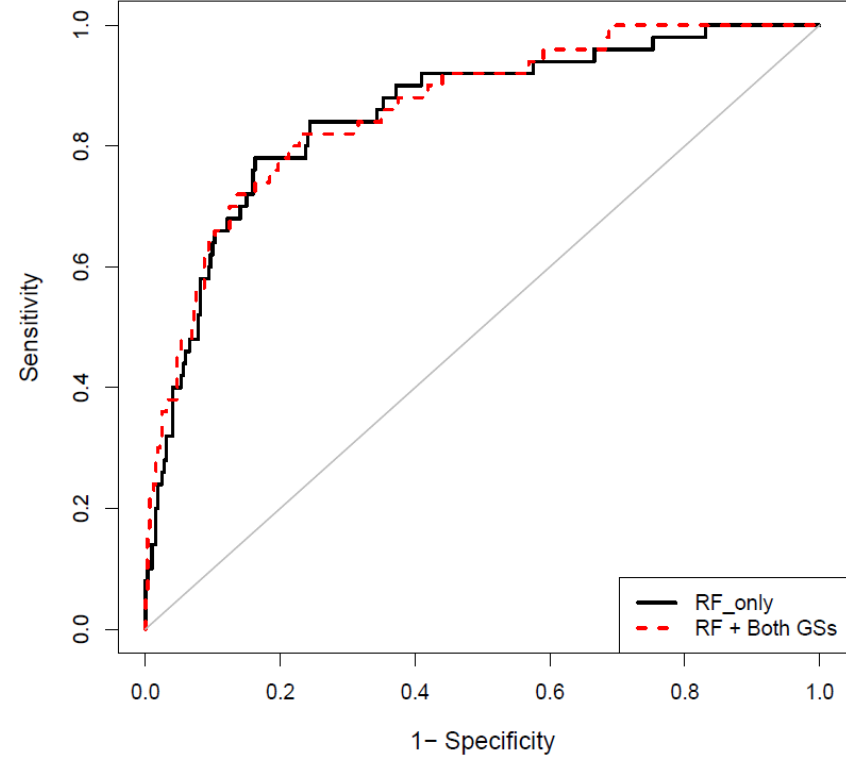

## Supplemental Figure Legends:

**Figure S1.** Multivariate models for the prediction of AF excluding patients with heart failure.

OR: Odds ratios (95% confidence intervals) for AF for a 1-SD increase in the score; AF-GS: Atrial fibrillation gene score; BA-GS: Biological age gene score; GS: Gene score

Model 1 was adjusted for age and sex

Model 2 was adjusted for age, sex, BMI, height, weight, smoking status (in the last 12 months and ever), systolic blood pressure, diastolic blood pressure, hypertension, diabetes, coronary artery disease, dyslipidemia, valvular heart disease, chronic renal failure, chronic obstructive pulmonary disease, relative lymphocytes, neutrophils and monocytes

**Figure S2.** Multivariate models for the prediction of Paroxysmal AF

OR: Odds ratios (95% confidence intervals) for AF for a 1-SD increase in the score; AF-GS: Atrial fibrillation gene score; BA-GS: Biological age gene score; GS: Gene score

Model 1 was adjusted for age and sex

Model 2 was adjusted for age, sex, BMI, height, weight, smoking status (in the last 12 months and ever), systolic blood pressure, diastolic blood pressure, hypertension, diabetes, coronary artery disease, dyslipidemia, valvular heart disease, chronic renal failure, chronic obstructive pulmonary disease, relative lymphocytes, neutrophils and monocytes

**Figure S3.** Multivariate models for the prediction of Permanent AF

OR: Odds ratios (95% confidence intervals) for AF for a 1-SD increase in the score; AF-GS: Atrial fibrillation gene score; BA-GS: Biological age gene score; GS: Gene score

Model 1 was adjusted for age and sex

Model 2 was adjusted for age, sex, BMI, height, weight, smoking status (in the last 12 months and ever), systolic blood pressure, diastolic blood pressure, hypertension, diabetes, coronary artery disease, dyslipidemia, valvular heart disease, chronic renal failure, chronic obstructive pulmonary disease, relative lymphocytes, neutrophils and monocytes

**Figure S4.** ROC Curves for the identification of prevalent AF by subtypes

A: Model including AF-GS compared to model including clinical risk factors alone for the identification of Paroxysmal AF; B: Model including both GSs compared to model including clinical risk factors alone for the identification of Paroxysmal AF; C: Model including BA-GS compared to model including clinical risk factors alone for the identification of Permanent AF; D: Model including both GSs compared to model including clinical risk factors alone for the identification of Permanent AF.

RF: Risk factors (age, sex, BMI, height, weight, smoking status (in the last 12 months and ever), systolic blood pressure, diastolic blood pressure, hypertension, diabetes, coronary artery disease, dyslipidemia, congestive heart failure, valvular heart disease, chronic renal failure, chronic obstructive pulmonary disease, relative lymphocytes, neutrophils and monocytes); AF-GS: Atrial fibrillation gene score; BA-GS: Biological age gene score; GS: Gene score
